# Supplementary material for: REST promotes ETS1‐dependent vascular growth in medulloblastoma
Source: PubMed Central journal article supplement (PMC8096796; doi:10.1002/1878-0261.12903), 2021-02-07
Supplement: MOL2-15-1486-s004.pdf [file MOL2-15-1486-s004.pdf]

**Supplementary Table 2; List of angiogenesis related genes.**

| Gene name      |     |              |                            |                                     |                                     |                       |                           |                                                  |                                                  |                                                                    |                                                 |                    |
|----------------|-----|--------------|----------------------------|-------------------------------------|-------------------------------------|-----------------------|---------------------------|--------------------------------------------------|--------------------------------------------------|--------------------------------------------------------------------|-------------------------------------------------|--------------------|
|                | Kit | ANGIOGENESIS | REGULATION_OF_ANGIOGENESIS | POSITIVE_REGULATION_OF_ANGIOGENESIS | NEGATIVE_REGULATION_OF_ANGIOGENESIS | HALLMARK_ANGIOGENESIS | GO_SPROUTING_ANGIOGENESIS | GO_POSITIVE_REGULATION_OF_SPROUTING_ANGIOGENESIS | GO_NEGATIVE_REGULATION_OF_SPROUTING_ANGIOGENESIS | GO_REGULATION_OF_CELL_MIGRATION_INVOLVED_IN_SPROUTING_ANGIOGENESIS | HELLEBREKERS_SILENCED_DURING_TUMOR_ANGIOGENESIS | ANGIOGENESIS (CST) |
| # of genes     | 55  | 48           | 26                         | 10                                  | 13                                  | 36                    | 189                       | 66                                               | 80                                               | 85                                                                 | 77                                              | 81                 |
| <i>ABI3BP</i>  |     |              |                            |                                     |                                     |                       |                           |                                                  |                                                  |                                                                    | 1                                               |                    |
| <i>ABL1</i>    |     |              |                            |                                     |                                     |                       | 1                         | 1                                                |                                                  | 1                                                                  |                                                 |                    |
| <i>ACSF2</i>   |     |              |                            |                                     |                                     |                       |                           |                                                  |                                                  |                                                                    | 1                                               |                    |
| <i>ACVRL1</i>  |     | 1            |                            |                                     |                                     |                       | 1                         |                                                  |                                                  |                                                                    |                                                 |                    |
| <i>ADA</i>     |     |              |                            |                                     |                                     |                       |                           |                                                  |                                                  |                                                                    | 1                                               |                    |
| <i>ADAMTS1</i> | 1   |              |                            |                                     |                                     |                       |                           |                                                  |                                                  |                                                                    |                                                 | 1                  |
| <i>ADAMTS9</i> |     |              |                            |                                     |                                     |                       | 1                         |                                                  | 1                                                |                                                                    |                                                 |                    |
| <i>ADM</i>     |     |              |                            |                                     |                                     |                       |                           |                                                  |                                                  |                                                                    | 1                                               |                    |
| <i>ADTRP</i>   |     |              |                            |                                     |                                     |                       | 1                         |                                                  |                                                  |                                                                    |                                                 |                    |
| <i>AGGF1</i>   |     | 1            | 1                          | 1                                   |                                     |                       |                           |                                                  |                                                  |                                                                    |                                                 |                    |
| <i>AGTR1</i>   |     |              |                            |                                     |                                     |                       | 1                         | 1                                                |                                                  |                                                                    |                                                 |                    |
| <i>AKT1</i>    |     |              |                            |                                     |                                     |                       | 1                         |                                                  |                                                  |                                                                    |                                                 |                    |
| <i>AKT3</i>    |     |              |                            |                                     |                                     |                       | 1                         | 1                                                |                                                  | 1                                                                  |                                                 |                    |
| <i>AMOT</i>    |     | 1            | 1                          | 1                                   |                                     |                       |                           |                                                  |                                                  |                                                                    |                                                 |                    |
| <i>ANG</i>     | 1   | 1            |                            |                                     |                                     |                       |                           |                                                  |                                                  |                                                                    |                                                 |                    |
| <i>ANGPT1</i>  | 1   |              |                            |                                     |                                     |                       | 1                         |                                                  |                                                  |                                                                    |                                                 |                    |

|         |   |   |   |   |  |   |   |   |   |   |  |   |
|---------|---|---|---|---|--|---|---|---|---|---|--|---|
| ANGPT2  | 1 |   |   |   |  |   |   |   |   |   |  | 1 |
| ANGPTL3 |   | 1 | 1 | 1 |  |   |   |   |   |   |  |   |
| ANGPTL4 |   | 1 | 1 | 1 |  |   |   |   |   |   |  |   |
| ANXA1   |   |   |   |   |  |   | 1 | 1 |   | 1 |  |   |
| APLNR   |   |   |   |   |  |   | 1 | 1 |   |   |  |   |
| APOE    |   |   |   |   |  |   |   |   |   |   |  | 1 |
| APOH    |   |   |   |   |  | 1 |   |   |   |   |  |   |
| APP     |   |   |   |   |  | 1 |   |   |   |   |  |   |
| AREG    | 1 |   |   |   |  |   |   |   |   |   |  |   |
| ARNT    |   |   |   |   |  |   |   |   |   |   |  | 1 |
| ARTN    | 1 |   |   |   |  |   |   |   |   |   |  |   |
| ASAH1   |   |   |   |   |  |   |   |   |   |   |  | 1 |
| ASS1    |   |   |   |   |  |   |   |   |   |   |  | 1 |
| BDNF    |   |   |   |   |  |   |   |   |   |   |  | 1 |
| BMP4    |   |   |   |   |  |   | 1 |   |   |   |  |   |
| BMPER   |   |   |   |   |  |   | 1 | 1 |   |   |  |   |
| BTG1    |   | 1 | 1 | 1 |  |   |   |   |   |   |  |   |
| C1GALT1 |   | 1 |   |   |  |   |   |   |   |   |  |   |
| CA9     |   |   |   |   |  |   |   |   |   |   |  | 1 |
| CADM1   |   |   |   |   |  |   |   |   |   |   |  | 1 |
| CANX    |   | 1 |   |   |  |   |   |   |   |   |  |   |
| CARD10  |   |   |   |   |  |   | 1 |   | 1 | 1 |  |   |
| CCBE1   |   |   |   |   |  |   | 1 |   |   |   |  |   |
| CCL11   |   |   |   |   |  |   |   |   |   |   |  | 1 |
| CCL2    | 1 |   |   |   |  |   |   |   |   |   |  | 1 |
| CCL3    | 1 |   |   |   |  |   |   |   |   |   |  |   |
| CCND2   |   |   |   |   |  |   | 1 |   |   |   |  |   |
| CDH13   |   | 1 |   |   |  |   | 1 |   |   |   |  |   |
| CDH2    |   |   |   |   |  |   |   |   |   |   |  | 1 |
| CDH5    |   |   |   |   |  |   |   |   |   |   |  | 1 |
| CDKN1A  |   |   |   |   |  |   |   |   |   |   |  | 1 |
| CEACAM1 |   |   |   |   |  |   | 1 |   |   |   |  |   |
| CHRNA7  |   | 1 | 1 | 1 |  |   |   |   |   |   |  |   |
| CIB1    |   |   |   |   |  |   | 1 | 1 |   | 1 |  |   |
| CLEC14A |   |   |   |   |  |   | 1 |   |   |   |  |   |
| CLIP3   |   |   |   |   |  |   |   |   |   |   |  | 1 |
| CLU     |   |   |   |   |  |   |   |   |   |   |  | 1 |
| CNN1    |   |   |   |   |  |   |   |   |   |   |  | 1 |
| COL18A1 | 1 |   |   |   |  |   |   |   |   |   |  |   |
| COL2A1  |   |   |   |   |  |   |   |   |   |   |  | 1 |
| COL3A1  |   |   |   |   |  |   | 1 |   |   |   |  |   |
| COL4A2  |   | 1 | 1 | 1 |  |   |   |   |   |   |  | 1 |
| COL4A3  |   | 1 | 1 | 1 |  |   |   |   |   |   |  |   |
| COL5A2  |   |   |   |   |  |   | 1 |   |   |   |  |   |
| COL6A1  |   |   |   |   |  |   |   |   |   |   |  | 1 |
| CPE     |   |   |   |   |  |   |   |   |   |   |  | 1 |
| CREB3L1 |   |   |   |   |  |   | 1 |   | 1 |   |  | 1 |





|          |   |  |  |  |   |   |   |   |   |   |  |   |
|----------|---|--|--|--|---|---|---|---|---|---|--|---|
| INHBA    | 1 |  |  |  |   |   |   |   |   |   |  | 1 |
| ITGA3    |   |  |  |  |   |   |   |   |   |   |  | 1 |
| ITGA5    |   |  |  |  |   | 1 | 1 |   |   |   |  | 1 |
| ITGA6    |   |  |  |  |   |   |   |   |   |   |  | 1 |
| ITGAV    |   |  |  |  | 1 |   |   |   |   |   |  | 1 |
| ITGB1    |   |  |  |  |   | 1 |   |   |   |   |  | 1 |
| ITGB1BP1 |   |  |  |  |   | 1 |   | 1 | 1 |   |  |   |
| ITGB3    |   |  |  |  |   |   |   |   |   |   |  | 1 |
| ITGB5    |   |  |  |  |   |   |   |   |   |   |  | 1 |
| ITM2B    |   |  |  |  |   |   |   |   |   |   |  | 1 |
| JAG1     |   |  |  |  | 1 |   |   |   |   |   |  | 1 |
| JAG2     |   |  |  |  | 1 |   |   |   |   |   |  |   |
| JAK1     |   |  |  |  |   | 1 | 1 |   |   |   |  |   |
| JCAD     |   |  |  |  |   | 1 | 1 |   |   | 1 |  |   |
| JMJD6    |   |  |  |  |   | 1 |   |   |   |   |  |   |
| JMJD8    |   |  |  |  |   | 1 | 1 |   |   |   |  |   |
| KCNJ8    |   |  |  |  | 1 |   |   |   |   |   |  |   |
| KDR      |   |  |  |  |   | 1 | 1 |   |   | 1 |  | 1 |
| KLF2     |   |  |  |  |   | 1 |   |   | 1 |   |  |   |
| KLF4     |   |  |  |  |   | 1 | 1 |   | 1 | 1 |  |   |
| LEF1     |   |  |  |  |   | 1 |   |   |   |   |  |   |
| LEP      | 1 |  |  |  |   |   |   |   |   |   |  |   |
| LOXL2    |   |  |  |  |   | 1 |   |   |   |   |  |   |
| LPL      |   |  |  |  | 1 |   |   |   |   |   |  |   |
| LRP1     |   |  |  |  |   |   |   |   |   |   |  | 1 |
| LRPAP1   |   |  |  |  | 1 |   |   |   |   |   |  |   |
| LUM      |   |  |  |  | 1 |   |   |   |   |   |  |   |
| MAP2K5   |   |  |  |  |   | 1 |   |   | 1 | 1 |  |   |
| MAP3K3   |   |  |  |  |   | 1 | 1 |   |   | 1 |  |   |
| MEFV     |   |  |  |  |   |   |   |   |   |   |  | 1 |
| MEOX2    |   |  |  |  |   | 1 |   |   | 1 | 1 |  |   |
| MIA3     |   |  |  |  |   | 1 |   |   |   |   |  |   |
| MIR101-1 |   |  |  |  |   | 1 | 1 |   |   | 1 |  |   |
| MIR101-2 |   |  |  |  |   | 1 | 1 |   |   | 1 |  |   |
| MIR10A   |   |  |  |  |   | 1 | 1 |   |   | 1 |  |   |
| MIR10B   |   |  |  |  |   | 1 | 1 |   |   | 1 |  |   |
| MIR1-1   |   |  |  |  |   | 1 | 1 |   |   |   |  |   |
| MIR1-2   |   |  |  |  |   | 1 | 1 |   |   |   |  |   |
| MIR125A  |   |  |  |  |   | 1 | 1 |   |   |   |  |   |
| MIR126   |   |  |  |  |   | 1 | 1 |   |   | 1 |  |   |
| MIR132   |   |  |  |  |   | 1 | 1 |   |   | 1 |  |   |
| MIR138-1 |   |  |  |  |   | 1 |   |   | 1 |   |  |   |
| MIR138-2 |   |  |  |  |   | 1 |   |   | 1 |   |  |   |
| MIR146A  |   |  |  |  |   | 1 | 1 |   | 1 | 1 |  |   |
| MIR150   |   |  |  |  |   | 1 | 1 |   |   | 1 |  |   |
| MIR155   |   |  |  |  |   | 1 | 1 |   | 1 | 1 |  |   |
| MIR15A   |   |  |  |  |   | 1 |   |   | 1 | 1 |  |   |

|          |  |  |  |  |  |  |   |   |   |   |  |  |
|----------|--|--|--|--|--|--|---|---|---|---|--|--|
| MIR15B   |  |  |  |  |  |  | 1 |   | 1 |   |  |  |
| MIR16-1  |  |  |  |  |  |  | 1 |   | 1 | 1 |  |  |
| MIR16-2  |  |  |  |  |  |  | 1 |   | 1 | 1 |  |  |
| MIR17    |  |  |  |  |  |  | 1 |   | 1 |   |  |  |
| MIR188   |  |  |  |  |  |  | 1 |   | 1 | 1 |  |  |
| MIR18A   |  |  |  |  |  |  | 1 |   | 1 |   |  |  |
| MIR193A  |  |  |  |  |  |  | 1 |   | 1 | 1 |  |  |
| MIR196A1 |  |  |  |  |  |  | 1 |   | 1 | 1 |  |  |
| MIR196A2 |  |  |  |  |  |  | 1 |   | 1 | 1 |  |  |
| MIR19A   |  |  |  |  |  |  | 1 |   | 1 |   |  |  |
| MIR19B1  |  |  |  |  |  |  | 1 |   | 1 | 1 |  |  |
| MIR19B2  |  |  |  |  |  |  | 1 |   | 1 | 1 |  |  |
| MIR206   |  |  |  |  |  |  | 1 |   | 1 | 1 |  |  |
| MIR20A   |  |  |  |  |  |  | 1 |   | 1 | 1 |  |  |
| MIR22    |  |  |  |  |  |  | 1 |   | 1 | 1 |  |  |
| MIR221   |  |  |  |  |  |  | 1 |   | 1 | 1 |  |  |
| MIR222   |  |  |  |  |  |  | 1 |   | 1 |   |  |  |
| MIR2355  |  |  |  |  |  |  | 1 |   | 1 | 1 |  |  |
| MIR23A   |  |  |  |  |  |  | 1 | 1 |   | 1 |  |  |
| MIR23B   |  |  |  |  |  |  | 1 | 1 | 1 | 1 |  |  |
| MIR24-1  |  |  |  |  |  |  | 1 |   | 1 |   |  |  |
| MIR24-2  |  |  |  |  |  |  | 1 |   | 1 |   |  |  |
| MIR26A1  |  |  |  |  |  |  | 1 |   | 1 | 1 |  |  |
| MIR26A2  |  |  |  |  |  |  | 1 |   | 1 | 1 |  |  |
| MIR27A   |  |  |  |  |  |  | 1 | 1 |   | 1 |  |  |
| MIR27B   |  |  |  |  |  |  | 1 | 1 |   | 1 |  |  |
| MIR296   |  |  |  |  |  |  | 1 | 1 |   | 1 |  |  |
| MIR29C   |  |  |  |  |  |  | 1 |   | 1 | 1 |  |  |
| MIR30B   |  |  |  |  |  |  | 1 | 1 |   |   |  |  |
| MIR30C1  |  |  |  |  |  |  | 1 |   | 1 |   |  |  |
| MIR30C2  |  |  |  |  |  |  | 1 |   | 1 |   |  |  |
| MIR30E   |  |  |  |  |  |  | 1 |   | 1 |   |  |  |
| MIR31    |  |  |  |  |  |  | 1 | 1 |   | 1 |  |  |
| MIR320A  |  |  |  |  |  |  | 1 |   | 1 | 1 |  |  |
| MIR34A   |  |  |  |  |  |  | 1 |   | 1 |   |  |  |
| MIR34B   |  |  |  |  |  |  | 1 |   | 1 |   |  |  |
| MIR34C   |  |  |  |  |  |  | 1 |   | 1 |   |  |  |
| MIR375   |  |  |  |  |  |  | 1 |   | 1 |   |  |  |
| MIR377   |  |  |  |  |  |  | 1 |   | 1 |   |  |  |
| MIR410   |  |  |  |  |  |  | 1 |   | 1 | 1 |  |  |
| MIR494   |  |  |  |  |  |  | 1 |   | 1 | 1 |  |  |
| MIR495   |  |  |  |  |  |  | 1 |   | 1 | 1 |  |  |
| MIR503   |  |  |  |  |  |  | 1 | 1 | 1 | 1 |  |  |
| MIR7-2   |  |  |  |  |  |  | 1 |   | 1 |   |  |  |
| MIR7-3   |  |  |  |  |  |  | 1 |   | 1 |   |  |  |
| MIR92A1  |  |  |  |  |  |  | 1 | 1 | 1 |   |  |  |
| MIR92A2  |  |  |  |  |  |  | 1 | 1 | 1 |   |  |  |



|          |   |   |   |   |   |   |   |   |   |   |  |   |
|----------|---|---|---|---|---|---|---|---|---|---|--|---|
| PDGFRB   |   |   |   |   |   |   |   |   |   |   |  | 1 |
| PDLIM3   |   |   |   |   |   |   |   |   |   |   |  | 1 |
| PDPK1    |   |   |   |   |   |   | 1 | 1 |   |   |  |   |
| PDPN     |   |   |   |   |   |   |   |   |   |   |  | 1 |
| PECAM1   |   |   |   |   |   |   |   |   |   |   |  | 1 |
| PF4      | 1 | 1 | 1 | 1 | 1 |   |   |   |   |   |  |   |
| PGF      | 1 |   |   |   |   |   | 1 |   |   |   |  |   |
| PGLYRP1  |   |   |   |   |   | 1 |   |   |   |   |  |   |
| PIK3C2A  |   |   |   |   |   |   | 1 | 1 |   | 1 |  |   |
| PIK3R3   |   |   |   |   |   |   | 1 |   |   |   |  |   |
| PKM      |   |   |   |   |   |   | 1 | 1 |   |   |  |   |
| PLAU     | 1 |   |   |   |   |   |   |   |   |   |  |   |
| PLG      | 1 | 1 | 1 | 1 |   |   |   |   |   |   |  |   |
| PLK2     |   |   |   |   |   |   | 1 | 1 |   | 1 |  |   |
| PLN      |   |   |   |   |   |   |   |   |   |   |  | 1 |
| PML      |   | 1 | 1 | 1 |   |   |   |   |   |   |  |   |
| POSTN    |   |   |   |   |   | 1 |   |   |   |   |  |   |
| PPP1R16B |   |   |   |   |   |   | 1 | 1 |   |   |  |   |
| PRG2     |   |   |   |   |   | 1 |   |   |   |   |  |   |
| PRL      | 1 |   |   |   |   |   |   |   |   |   |  |   |
| PROK1    | 1 |   |   |   |   |   |   |   |   |   |  |   |
| PROK2    |   | 1 |   |   |   |   |   |   |   |   |  |   |
| PROX1    |   |   |   |   |   |   |   |   |   |   |  | 1 |
| PSPN     | 1 |   |   |   |   |   |   |   |   |   |  |   |
| PTGS2    |   |   |   |   |   |   | 1 | 1 |   | 1 |  | 1 |
| PTK2     |   |   |   |   |   | 1 |   |   |   |   |  |   |
| PTK2B    |   |   |   |   |   |   | 1 |   |   |   |  |   |
| PTPN14   |   |   |   |   |   |   |   |   |   |   |  | 1 |
| PTX3     | 1 |   |   |   |   |   |   |   |   |   |  |   |
| QSOX1    |   |   |   |   |   |   |   |   |   |   |  | 1 |
| RAMP2    |   |   |   |   |   |   | 1 |   |   |   |  |   |
| RECK     |   |   |   |   |   |   | 1 |   |   |   |  | 1 |
| RELB     |   |   |   |   |   |   |   |   |   |   |  | 1 |
| REN      |   |   |   |   |   |   |   |   |   |   |  | 1 |
| RHOA     |   |   |   |   |   |   | 1 |   | 1 | 1 |  |   |
| RHOB     |   | 1 | 1 | 1 |   |   |   |   |   |   |  |   |
| RHOJ     |   |   |   |   |   |   | 1 | 1 |   | 1 |  |   |
| RNH1     |   | 1 | 1 |   |   |   |   |   |   |   |  |   |
| ROB01    |   |   |   |   |   |   | 1 |   |   |   |  |   |
| ROB04    |   | 1 |   |   |   |   |   |   |   |   |  |   |
| RSPO3    |   |   |   |   |   |   | 1 |   |   |   |  |   |
| RUNX1    |   | 1 | 1 | 1 |   |   |   |   |   |   |  |   |
| S100A1   |   |   |   |   |   |   | 1 | 1 |   |   |  |   |
| S100A4   |   |   |   |   |   |   | 1 |   |   |   |  |   |
| SCG2     |   | 1 |   |   |   |   |   |   |   |   |  |   |
| SDC4     |   |   |   |   |   |   |   |   |   |   |  | 1 |
| SEMA3E   |   |   |   |   |   |   | 1 |   |   |   |  |   |
