# Supplementary material for: REST promotes ETS1‐dependent vascular growth in medulloblastoma
Source: PubMed Central journal article supplement (PMC8096796; doi:10.1002/1878-0261.12903), 2021-02-07

# Supplementary Figure 5

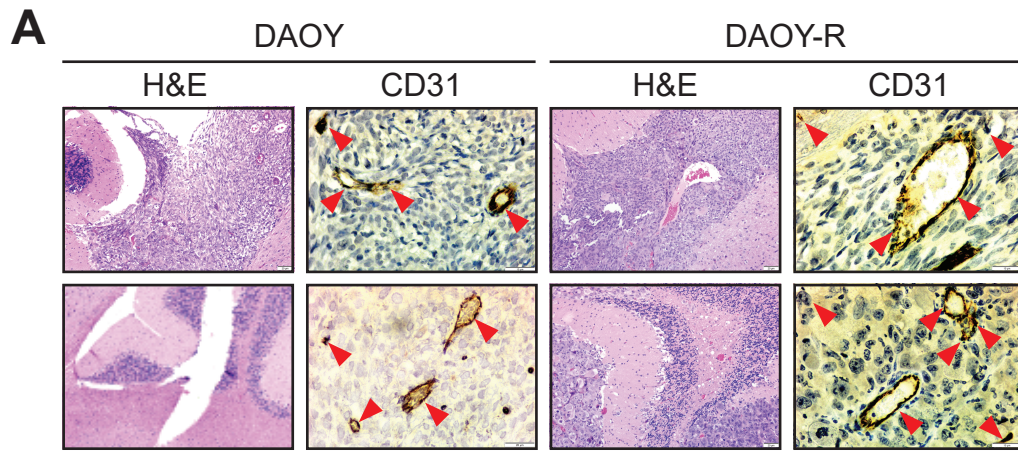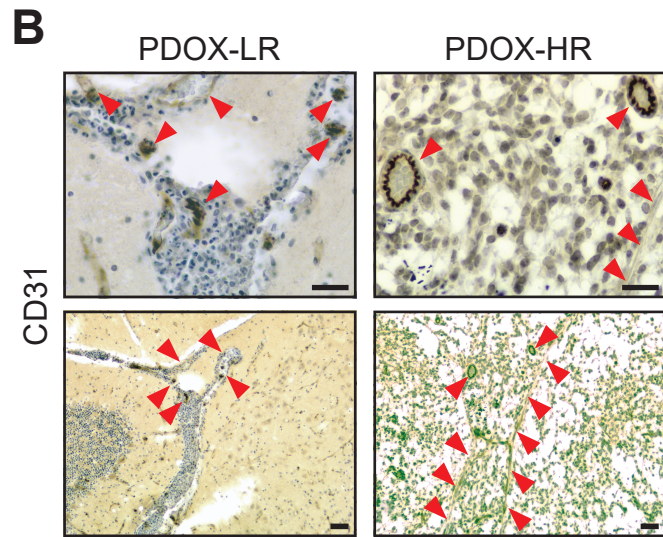

Supplement: MOL2-15-1486-s008.pdf [file MOL2-15-1486-s008.pdf]
