# Supplementary material for: REST promotes ETS1‐dependent vascular growth in medulloblastoma
Source: Mol Oncol. 2021 Feb 7;15(5):1486–506. doi: 10.1002/1878-0261.12903 (PMC8096796; doi:10.1002/1878-0261.12903)
Supplement: Supplementary file 11 — Table S1. Densitometric analysis of proteomic array. [file MOL2-15-1486-s001.pdf]

[illegible]

---
